# 1 Synthetic datasets and community tools for the rapid testing 2 of ecological hypotheses

3 Timothée Poisot <sup>1,2,\*</sup>, Dominique Gravel <sup>2,3</sup>, Shawn Leroux <sup>4</sup>, Spencer A. Wood <sup>5,6</sup>, Marie-Josée  
4 Fortin <sup>7</sup>, Benjamin Baiser <sup>8</sup>, Alyssa R. Cirtwill <sup>9</sup>, Miguel B. Araújo <sup>10</sup>, Daniel B. Stouffer <sup>9</sup>

5 (1) Université de Montréal, Département de Sciences Biologiques, 90 Avenue Vincent d'Indy, Montréal, QC,  
6 CAN, H2V3S9

7 (2) Québec Centre for Biodiversity Sciences, 1205 Dr. Penfield Avenue, Montréal, QC, CAN, H3A1B1

8 (3) Université du Québec à Rimouski, Département de Biologie, 300 Allée des Ursulines, Rimouski, QC,  
9 CAN, G5L3A1

10 (4) Memorial University of Newfoundland, Department of Biology, 232 Elizabeth Ave, St. John's, NL, CAN,  
11 A1B3X9

12 (5) Woods Institute for the Environment, Stanford University, Stanford, CA, USA

13 (6) School for Environmental and Forest Science, University of Washington, Seattle, WA, USA

14 (7) University of Toronto, Department of Ecology & Evolutionary Biology, 25 Harbord Street, Toronto, ON,  
15 CAN, M5S3G5

16 (8) University of Florida, Department of Wildlife, Ecology & Conservation, Gainesville, FL, USA

17 (9) Centre for Integrative Ecology, School of Biological Sciences, University of Canterbury, Christchurch,  
18 New Zealand

19 (10) Museo Nacional de Ciencias Naturales, CSIC, C/ José Gutiérrez Abascal 2, Madrid 28006, España

20  
21 \* e-mail: [tim@poisotlab.io](mailto:tim@poisotlab.io)

22 **Abstract:** The increased availability of both open ecological data, and software to interact with it, allows the  
23 fast collection and integration of information at all spatial and taxonomic scales. This offers the opportunity  
24 to address macroecological questions in a cost-effective way. In this contribution, we illustrate this approach  
25 by forecasting the structure of a stream food web at the global scale. In so doing, we highlight the most salient  
26 issues needing to be addressed before this approach can be used with a high degree of confidence.

27 **Keywords:** open data    API    species distributions    computational ecology    trophic interac-  
28 tions

29 **Date:** work in progress

30 Ecologists are often asked to provide information and guidance to solve a variety of issues, across  
31 different scales. As part of the global biodiversity crisis, notable examples include predicting the  
32 consequences of the loss of trophic structure (Estes et al. 2011), rapid shifts in species distribu-  
33 tions (Gilman et al. 2010), and increased anthropogenic stress on species and their environment.  
34 Most of these pressing issues require the integration of a variety of ecological data and information,  
35 spanning different geographical and environmental scales, to be properly addressed (Thuiller et al.  
36 2013). Because of these requirements, relying solely on *de novo* sampling of the ecological systems  
37 of interests is not a viable solution on its own. Chiefly, there are no global funding mechanisms  
38 available to finance systematic sampling of biological data, and the spatial and temporal scales re-  
39 quired to acquire meaningful data on biodiversity change are such that it would take a long time  
40 before realistic data would be available to support the decision process. While that data collection  
41 must continue, we propose that there are a large number of macroecological questions that could  
42 be addressed without additional data or with data acquired at minimal cost, by making use of open  
43 data and community-developed software and platforms.

44 Existing datasets can, to an increasing extent, be used to *build* new datasets (henceforth *synthetic*  
45 datasets, since they represent the synthesis of several types of data). There are several parallel  
46 advances that make this approach possible. First, the volume of data on ecological systems that  
47 are available *openly* increases on a daily basis. This includes point-occurrence data (as in GBIF or  
48 BISON), but also taxonomic knowledge (through ITIS, NCBI or EOL) or trait and interactions data.  
49 In fact, there is a vast (and arguably under-exploited) amount of ecological information, that is now  
50 available without having to contact and secure authorization from every contributor individually.  
51 Second, these data are often available in a *programmatic* way; as opposed to manually visiting data  
52 repositories, and downloading or copy-and-pasting datasets, several software packages offer the  
53 opportunity to query these databases automatically, considerably speeding up the data collection  
54 process. As opposed to manual collection, identification, and maintenance of datasets, most of  
55 these services implement web APIs (Application Programming Interface, *i.e.* services that allow  
56 users to query and/or upload data in a standard format). These services can be queried, either once

57 or on a regular basis, to retrieve records with the desired properties. This ensures that the process  
58 is repeatable, testable, transparent, and (as long as the code is properly written) nearly error proof.  
59 Finally, most of the heavy lifting for these tasks can be done through a *burgeoning ecosystem of*  
60 *packages and software* that handles query formatting, data retrieval, and associated tasks, all the  
61 while exposing simple interfaces to researchers. None of these are *new* data, in the sense that these  
62 collections represent the aggregation of thousands of ecological studies; the originality lies in the  
63 ability to query, aggregate, curate, and use these data consistently and in a new way using open  
64 solutions.

65 Hypothesis testing for large-scale systems is inherently limited by the availability of suitable datasets  
66 – most data collection results in small scale, local data, and it is not always clear how these can be  
67 used at more global scales. Perhaps as a result, developments in macroecology have primarily been  
68 driven by a search for patterns that are very broad both in scale and nature (Keith et al. 2012, Beck-  
69 nell et al. 2015). While it is obvious that collecting exhaustive data at scales that are large enough  
70 to be relevant can be an insurmountable effort (because of the monetary, time, and human costs  
71 needed), we suggest that macroecologists could, in parallel, build on existing databases, and aggre-  
72 gate them in a way that allows direct testing of proposals stemming from theory. To us, this opens  
73 no less than a new way for ecologists to ask critical research questions, spanning from the local to  
74 the global, and from the organismal to the ecosystemic, scales. Here, we (i) outline approaches for  
75 integrating data from a variety of sources (both in terms of provenance, and type of ecological in-  
76 formation), (ii) identify technical bottlenecks, (iii) discuss issues related to scientific ethics and best  
77 practice, and (iv) provide clear recommendations moving forward with these approaches at larger  
78 scales. Although we illustrate the principles and proposed approaches with a real-life example, the  
79 objective of this paper is to highlight the way different tools can be integrated in a single study, and to  
80 discuss the current limitations of this approach. This approach can, for example, prove particularly  
81 fruitful if it allows researchers to either offer new interpretation of well-described macroecological  
82 relationships, or to provide tests of hypotheses suggested by theoretical studies (Levin 2012).

## 83 **1 An illustrative case-study**

84 Food-web data, that is the determination of trophic interactions among species, are notoriously dif-  
85 ficult to collect. The usual approach is to assemble literature data, expert knowledge, and additional  
86 information coming from field work, either as direct observation of feeding events or through gut-  
87 content analysis. Because of these technical constraints, food-web data are most often assembled  
88 based on sampling in a single location. Assessments of food web structure over space may there-  
89 fore require comparisons of communities composed of different taxa. As a consequence, most food  
90 web properties over large (continental, global) spatial extents remain undocumented. For example,  
91 what is the relationship between latitude and connectance (the density of feeding interactions)? One  
92 possible way to approach this question is to collect data from different localities, and document the  
93 relationship between latitude and connectance through regressions. The approach we illustrate uses  
94 broad-scale data integration to forecast the structure of a single system at the global scale (Pellissier  
95 et al. 2013). We are interested in predicting the structure of a pine-marsh food web, worldwide.

### 96 **1.1 Interactions data**

97 The food-web data were taken from Thompson et al. (2012), as made available in the IWDB database  
98 ([https://www.nceas.ucsb.edu/interactionweb/html/thomps\\_towns.html](https://www.nceas.ucsb.edu/interactionweb/html/thomps_towns.html)) – starting from  
99 the Martins dataset (stream food web from a pine forest in Maine). Wetlands and other fresh-  
100 water ecosystems are critically endangered and serve as a home to a host of endemic biodiversity  
101 (Fensham et al. 2011, Minckley et al. 2013). Stream food webs in particular are important because  
102 they couple terrestrial and aquatic communities and ensure the maintenance of ecosystem services  
103 such as freshwater quality and flood regulation. Anthropogenic pressure on wetlands makes them  
104 particularly threatened. They represent a prime example of ecosystems for which data-driven pre-  
105 diction can be used to generate scenarios at a temporal scale relevant for conservation decisions,  
106 and at a faster rate than sampling allows.

107 The data from the original food web had 105 nodes, including vague denominations like *Unidenti-*  
108 *fied detritus* or *Terrestrial invertebrates*. First, we aggregated all nodes to the *genus* level. Due to  
109 the high level of structure in trophic interactions emerging from taxonomic rank alone (Eklöf et al.  
110 2011, Stouffer et al. 2012, Eklöf and Stouffer 2015), aggregating to the genus level has the double  
111 advantage of (i) removing ambiguities on the identification of species and (ii) allowing integration  
112 of data when any two species from given genera interact. Second, we removed all nodes that were  
113 not identified (Unidentified or Unknown in the original data). The cleaned network documented  
114 227 interactions, between 80 genera. We then used the name-checking functions from the *taxize*  
115 package (Chamberlain and Szöcs 2013) to perform the following steps. First, all names were re-  
116 solved, and one of the following was applied: valid names were conserved, invalid names with a  
117 close replacement were corrected, and invalid names with no replacement were removed. In most  
118 situations, invalid names were typos in the spelling of valid ones. After this step, 74 genera with 189  
119 interactions remained, representing a high quality genus-level food-web from the original sampling.

120 Because this food web was sampled *locally*, there is the possibility that interactions between genera  
121 are not reported; either because species from these genera do not interact or do not co-occur in  
122 the sampling location, or because of spatial mismatches between genus occurrence and sampling.  
123 To circumvent this, we queried the *GLOBI* database (Poelen et al. 2014) for each genus name,  
124 and retrieved all *feeding* interactions; this includes taxa from the original dataset, but also taxa that  
125 establish interactions with them even though these were not observed in the original sample. For all  
126 *new* genera retrieved through this method, we also retrieved their interactions with genera already  
127 in the network. The inflated network (original data plus data from *GLOBI*) has 368 genera, and a  
128 total of 4796 interactions between them.

129 As a final step, we queried the GBIF taxonomic rank database with each of these (tentatively) genera  
130 names. Every tentative genus that was either not found, or whose taxonomic level was not *genus*,  
131 was removed from the network.

132 The code to reproduce this analysis is in the `1_get_data.r` suppl. file.

133 It should be noted that this analysis relies on *databases*, and a vast majority of information is con-  
134 fined to the primary literature. While it is possible to do manual literature surveys (*e.g.* Strong  
135 and Leroux 2014), this task becomes daunting for large number of species. Initiatives like text-  
136 mining (Milani et al. 2012) will speed up the rate at which we can recover interactions data from  
137 the literature – if publishers allow researchers to mine the literature they create.

## 138 **1.2 Occurrence data and filtering**

139 For each genus, we retrieved the known occurrences (approx.  $2 \times 10^5$ ) from GBIF and BISON.  
140 Because the ultimate goal is to perform spatial modeling of the structure of the network, we removed  
141 genera for which fewer than 100 occurrences in the entire dataset. This stringent filter enables us  
142 (i) to maintain high predictive powers for SDMs, and (ii) to work on the genera for which we have  
143 “high-quality” data. The cleaned food web had a total of 134 genera and 782 interactions, for 118269  
144 presences. Given the curated publicly available data, it represents the current best description of  
145 feeding interactions between species of this ecosystem. A visual depiction of the network is given  
146 in Figure 1.

147 On its own, the fact that filtering for genera with over 100 records reduced the sample size from 368  
148 genera to 134 indicates the importance of the deposition of all observations in public databases.  
149 This is because the analysis we present here, although cost-effective and enabling rapid evaluation  
150 of different scenarios, is only as good as the underlying data. Since most modeling tools require a  
151 minimal sample size in order to achieve acceptable accuracy, concerted efforts by the community  
152 and funding agencies to ensure that the minimal amount of data is deposited upon publication or  
153 acquisition is needed. It must also be noted that the threshold of 100 occurrences is an arbitrary  
154 one.

155 The approach is amenable to sensitivity analysis, and indeed this will be a crucial component of  
156 future analyses. A taxon can have less observations than the threshold either because of under-

157 sampling or under-reporting, or because it is naturally rare. In the context of food webs, species  
158 higher-up the food chain can be less common than primary producers. To which extent these rela-  
159 tionships between, *e.g.*, trophic position and rarity, can influence the predictions, will have to receive  
160 attention.

161 The code to reproduce this analysis is in the `1_get_data.r` suppl. file.

### 162 **1.3 Species Distribution Model**

163 For each species in this subset of data, we retrieved the nineteen bioclim variables (Hijmans et  
164 al. 2005), with a resolution of 5 arc-minutes. This enabled us to build climatic envelope models,  
165 using *bioclim*, for each species. These models tend to be more conservative than alternate modeling  
166 strategies, in that they predict smaller range sizes (Hijmans and Graham 2006), but they also perform  
167 well overall for presence-only data (Elith et al. 2006, Elith and Graham 2009). The output of these  
168 models is, for species  $i$ , the probability of an observation  $P(i)$  within each pixel. We appreciate that  
169 this is a coarse analysis, but its purpose is to highlight how to combine different data. A discussion  
170 of the limitations of this approach is given below.

171 The code to reproduce this analysis is in the `2_get_sdm.r` suppl. file.

### 172 **1.4 Assembly**

173 For every interactions in the food web, we estimated the probability of it being observed in each  
174 pixel as the product of the probabilities of observing each species on its own:  $P(L_{ij}) \propto P(i)P(j)$ .  
175 This resulted in one LDM (“link distribution model”) for each interaction. It should be noted that  
176 co-occurrence is considered to be entirely neutral, in that we assume that the probability that two  
177 species co-occur is independent (*i.e.* a predator is not more likely to be present if there are, or are  
178 not, potential prey). We also assume no variability in interactions, as in Havens (2015). It is likely

179 that, in addition to their occurrence, species co-occurrences and interactions (Poisot et al. 2015) are  
180 affected by climate. Whether or not these constitute acceptable assumptions has to be decided for  
181 each study.

182 The code to reproduce this analysis is in the `3_get_ldm.r` suppl. file.

183 Based on this information, we generated example illustrations (using `4_draw_figures.r` – Figure  
184 2). The system is characterized, at the world-wide scale, by an increased number of genera *and*  
185 interactions in temperate areas, with diversity and interaction hotspots in Western Europe, North-  
186 East and South-Atlantic America, and the western coasts of New Zealand and Australia – this is  
187 clearly symmetrical along the equator. Network structure, here measured by network connectance,  
188 follows a different trend than genera richness or interactions do. Connectance is stable along the  
189 gradient, but declines at extreme latitudes (Figure 2B).

## 190 **2 Challenges moving forward**

191 The example provided illustrates the promises of data-driven approaches. It builds on new data  
192 availability, new statistical and computational tools, and new ways to integrate both. Most im-  
193 portantly, it allows us to use “classical” ecological data in a resolutely novel way, thus presenting  
194 an important opportunity to bridge a gap between field-based and theory-based macroecological  
195 research. But as with every methodological advancement, comes a number of challenges and limi-  
196 tations. Here we discuss a few we believe are important. In doing so, we hope to define these issues  
197 and emphasize that each of them, on their own, should be the subject of further discourse.



## 198 **2.1 Attribution stacking and intellectual provenance**

199 The merging of large databases has already created a conflict of how to properly attribute data  
200 provenance (Carroll 2015). Here there are at least two core issues that will require community  
201 consultation in order to be resolved. First, *what is the proper mode of attribution when a very large*  
202 *volume of data are aggregated?* Second, *what should be the intellectual property of the synthetic*  
203 *dataset?* Currently, citations (whether to articles or datasets) are only counted when they are part  
204 of the main text. The simple example outlined here relies on well over a thousand references, and  
205 it makes little sense to expect that they would be provided in the main text (nor do we expect any  
206 journal to accept a manuscript with over a hundred references or so, with rare exceptions). One  
207 intermediate solution would be to collate these references in a supplement, but it is unclear that  
208 these would be counted (Seeber 2008), and therefore contribute to the *impact* of each individual  
209 dataset (and hence, collector; Kueffer et al. 2011). This is a problem that we argue is best solved  
210 by publishers; proper attribution and credit is key to provide incentives to data release (Kenall et  
211 al. 2014, Whelan et al. 2014, Pronk et al. 2015). As citations are currently the “currency” of  
212 scientific impact, publishers have a responsibility not only to ensure that data are available (which  
213 many already do), but that they are recognized; data citation, no matter how many data are cited, is  
214 a way to achieve this goal. The synthetic dataset, on the other hand, can reasonably be understood  
215 as a novel product; there is technical and intellectual effort involved in producing it, and although it  
216 is a derivative work, we would encourage authors to deposit it anew. Nevertheless, we would like  
217 to see a more meaningful dialogue between editors, publishers, and authors, to determine how the  
218 citation of thousands of datasets ought to be handled across the editorial process.

## 219 **2.2 Sharing of code and analysis pipeline**

220 Ideally, authors should release their analysis *pipeline* (that is, the series of steps, represented by  
221 code, needed to reproduce the analysis starting from a new dataset) in addition to the data and

222 explanation of the steps. The pipeline can take the form of a `makefile` (which allows one to generate  
223 the results, from the raw data, without human intervention), or be all of the relevant code that  
224 allows to re-generate the figures and results. For example, we have released all of the R code that  
225 was used to generate the figures at <https://zenodo.org/record/31975>. Sharing the analysis  
226 pipeline has several advantages. First, it is a first step towards ensuring the quality of analyses,  
227 since reviewers can (and should reasonably be expected to) look at the source code. Second, it  
228 provides a *template* for future analyses – instead of re-developing the pipeline from scratch, authors  
229 can re-use (and acknowledge) the previous code base and build on it. Finally, it helps identify areas  
230 of future improvement. The development of software should primarily aim to make the work of  
231 researchers easier. Looking at commonalities in the analytical pipelines for which no ready-made  
232 solutions exists will be a great way to influence priorities in software development. Properly citing  
233 and reviewing computer code is still an issue, because software evolves whereas papers remain (for  
234 now) frozen in the state where they were published. Being more careful with citation, notably by  
235 including version number (White 2015) or using unique identifiers (Poisot 2015), will help long-  
236 term reproducibility.

### 237 **2.3 Computational literacy**

238 This approach hardly qualifies as *big data*; nevertheless, it relies on the management and integration  
239 of a large volume of heterogeneous information, both qualitatively larger than the current “norm”.  
240 The first challenge is being able to *manage* these data; it requires data management skills that are  
241 not usually needed when the scale of the dataset is small, and, fallible though the process may be,  
242 when data can reasonably be inspected manually. The second challenge is being able to *manipulate*  
243 these data; even within the context of this simple use-case, the data do not fit in the memory of  
244 R (arguably the most commonly known and used software in ecology) without some adjustments.  
245 Once these issues were overcome, running the analysis involved a few hours worth of computation  
246 time. Computational approaches are going to become increasingly common in ecology (Hampton et

247 al. 2012, 2013), and are identified by the community as both in-demand skills and as not receiving  
248 enough attention in current ecological curricula (Barraquand et al. 2014). It seems that efforts  
249 should be allocated to raise the computational literacy of ecologists, and recognize that there is  
250 value in the diversity of tools one can use to carry out more demanding studies. For example, both  
251 Python and Julia are equally as user friendly as R while also being more powerful and better suited  
252 for computationally- or memory-intensive analyses.

## 253 **2.4 Standards and best practices**

254 In conducting this analysis, we noticed that a common issue was the identification of species and  
255 genera. All of these datasets were deposited by individual scientists; whether we like it or not,  
256 individuals are prone to failure in a very different way than the “Garbage in, garbage out” idea  
257 that applies to computer programs. Using tools such as taxize (Chamberlain and Szöcs 2013) can  
258 allow us to resolve a few of the uncertainties, yet this must be done every time the data are queried  
259 and requires the end user to make educated guesses as to what the “true” identity of the species  
260 is. These limitations can be overcome, on two conditions. Database maintainers should implement  
261 automated curation of the data for which they are stewards, and identify potential mistakes and  
262 correct them upstream, so that users download high-quality, high-reliability data. Data contributors  
263 should rely more extensively on biodiversity identifiers (such as TSN, GBIF, NCBI Taxonomy ID,  
264 etc.), to make sure that even when there are typos in the species name, they can be matched across  
265 datasets. Constructing this dataset highlighted a fundamental issue: the rate-limiting step is rarely  
266 the availability of appropriate tools or platforms, but instead it is the adoption of common standards  
267 and the publication of data in a way that conforms to them. In addition, Maldonado et al. (2015)  
268 emphasize that point-occurrence data are not always properly reported – for example, the center of  
269 a country or region can be used when no other information is known; this requires an improved  
270 dialogue between data collectors and data curators, to highlight which practices have the highest  
271 risk of biasing future analyses.

## 272 **2.5 Propagation of error**

273 There are always caveats to using synthetic datasets. First, the extent to which each component  
274 dataset is adequately sampled is unknown (although there exist ways to assess the overall represen-  
275 tativeness of the assembled dataset; Schmill et al. (2014)). This can create gaps in the information  
276 that is available when all component datasets are being merged. Second, because it is unlikely that  
277 all component datasets were acquired using reconcilable standards and protocol, it is likely that  
278 much of the quantitative information needs be discarded, and therefore the conservative position  
279 is to do qualitative analyses only. Although these have to be kept in mind, we do not think they  
280 are so sufficient as to prevent use and evaluation of the approach we suggest. For one thing, as  
281 we illustrate, at large spatial and organizational scales, coarse- grained analyses are still able to  
282 pick up qualitative differences in community structure. Second, most emergent properties are rel-  
283 atively insensitive to fine- scale error; for example, Gravel et al. (2013) show that even though a  
284 simple statistical model of food-web structure mispredicts some individual interactions, it produces  
285 communities with realistic emergent properties. Which level of error is acceptable needs to be de-  
286 termined for each application, but we argue that the use of synthetic datasets is a particularly cost-  
287 and time-effective approach for broad-scale description of community-level measures.

## 288 **3 Conclusion – why not?**

289 In light of the current limitations and challenges, one might be tempted to question the ultimate  
290 validity and utility of this approach. Yet there are several strong arguments, that should not be  
291 overlooked, in favor of its use. As we demonstrate with this example, synthetic datasets allow us  
292 to rapidly generate qualitative predictions at large scales. These can, for example, serve as a basis  
293 to forecast the effect of scenarios of climate change on community properties (Albouy et al. 2012,  
294 2014). Perhaps more importantly, synthetic datasets will be extremely efficient at identifying gaps  
295 in our knowledge of biological systems: either because there is high uncertainty or sensitivity to

296 choices in the model output, or because there is no available information to incorporate in these  
297 models. By building these datasets, it will be easier to assess the extent of our knowledge of biodi-  
298 versity, and to identify areas or taxa of higher priority for sampling. For this reason, using synthetic  
299 datasets is *not* a call to do less field-based science. Quite the contrary: in addition to highlighting  
300 areas of high uncertainty, synthetic datasets provide *predictions* that require field-based validation.  
301 Only through this feedback can we build enough confidence in this approach to apply it for more  
302 ambitious questions, or disqualify it altogether. Meanwhile, the use of synthetic datasets will neces-  
303 sitate the development of both statistical methodology and software; this is one of the required steps  
304 towards real-time use and analysis of ecological data (Antonelli et al. 2014). We appreciate that  
305 this approach currently comes with some limitations – they are unlikely to be overcome except with  
306 increased use, testing, and validation. Since the community already built effective and user-friendly  
307 databases and tools, there is very little cost (both in time and in funding) in trying these methods  
308 and there is also the promise of great potential.

309 **Acknowledgments** – This work was funded in part through a grant from the Canadian Institute of  
310 Ecology and Evolution. TP was funded by a Starting grant from the Université de Montréal, and  
311 a NSERC Discovery Grant. SL was funded by a NSERC Discovery Grant. DBS acknowledges a  
312 Marsden Fund Fast-Start grant (UOC-1101) and Rutherford Discovery Fellowship, both adminis-  
313 tered by the Royal Society of New Zealand. We thank Kévin Cazelles for constructive comments  
314 on the manuscript. We thank Anne Bruneau and Andrew Gonzalez for organizing the workshop at  
315 which this approach was first discussed. We thank Ross Mounce and one anonymous reviewer for  
316 comments on the manuscript.

## 317 **References**

318 Albouy, C. et al. 2012. Projected climate change and the changing biogeography of coastal Mediter-  
319 ranean fishes (P Pearman, Ed.). - J. Biogeogr. 40: 545–547.

- 320 Albouy, C. et al. 2014. From projected species distribution to food-web structure under climate  
321 change. - *Glob Change Biol* 20: 730–741.
- 322 Antonelli, A. et al. 2014. SUPERSMART: ecology and evolution in the era of big data. 2
- 323 Barraquand, F. et al. 2014. Lack of quantitative training among early-career ecologists: a survey of  
324 the problem and potential solutions. - *PeerJ* 2: e285.
- 325 Becknell, J. M. et al. 2015. Assessing Interactions Among Changing Climate, Management, and  
326 Disturbance in Forests: A Macrosystems Approach. - *BioScience* 65: 263–274.
- 327 Carroll, M. W. 2015. Sharing Research Data and Intellectual Property Law: A Primer. - *PLoS Biol*  
328 13: e1002235.
- 329 Chamberlain, S. A. and Szöcs, E. 2013. taxize: taxonomic search and retrieval in R. - *F1000Research*  
330 in press.
- 331 Eklof, A. et al. 2011. Relevance of evolutionary history for food web structure. - *Proc. R. Soc. B*  
332 *Biol. Sci.* 279: 1588–1596.
- 333 Eklöf, A. and Stouffer, D. B. 2015. The phylogenetic component of food web structure and inter-  
334 vality. - *Theor Ecol* in press.
- 335 Elith, J. and Graham, C. H. 2009. Do they? How do they? WHY do they differ? On finding reasons  
336 for differing performances of species distribution models. - *Ecography* 32: 66–77.
- 337 Elith, J. et al. 2006. Novel methods improve prediction of species' distributions from occurrence  
338 data. - *Ecography* 29: 129–151.
- 339 Estes, J. A. et al. 2011. Trophic Downgrading of Planet Earth. - *Science* 333: 301–306.
- 340 Fensham, R. J. et al. 2011. Four desert waters: setting arid zone wetland conservation priorities  
341 through understanding patterns of endemism. - *Biol. Conserv.* 144: 2459–2467.

- 342 Gilman, S. E. et al. 2010. A framework for community interactions under climate change. - Trends  
343 Ecol. Evol. 25: 325–331.
- 344 Gravel, D. et al. 2013. Inferring food web structure from predator-prey body size relationships. -  
345 Methods Ecol Evol 4: 1083–1090.
- 346 Hampton, S. E. et al. 2012. Ecological data in the Information Age. - Frontiers in Ecology and the  
347 Environment 10: 59–59.
- 348 Hampton, S. E. et al. 2013. Big data and the future of ecology. - Frontiers in Ecology and the  
349 Environment 11: 156–162.
- 350 Havens, K. 2015. Scale and structure in natural food webs. - Science 257: 1107–1109.
- 351 Hijmans, R. J. and Graham, C. H. 2006. The ability of climate envelope models to predict the effect  
352 of climate change on species distributions. - Glob. Change Biol. 12: 2272–2281.
- 353 Hijmans, R. J. et al. 2005. Very high resolution interpolated climate surfaces for global land areas.  
354 - Int. J. Climatol. 25: 1965–1978.
- 355 Keith, S. A. et al. 2012. What is macroecology? - Biology Letters: rsbl20120672.
- 356 Kenall, A. et al. 2014. An open future for ecological and evolutionary data? - BMC Ecology 14:  
357 10.
- 358 Kueffer, C. et al. 2011. Fame, glory and neglect in meta-analyses. - Trends in Ecology & Evolution  
359 26: 493–494.
- 360 Levin, S. A. 2012. Towards the marriage of theory and data. - Interface Focus 2: 141–143.
- 361 Maldonado, C. et al. 2015. Estimating species diversity and distribution in the era of Big Data: to  
362 what extent can we trust public databases? - Global Ecology and Biogeography: n/a–n/a.

- 363 Milani, G. A. et al. 2012. Machine Learning and Text Mining of Trophic Links. - 2012 11th  
364 International Conference on Machine Learning and Applications
- 365 Minckley, T. A. et al. 2013. The relevance of wetland conservation in arid regions: a re-examination  
366 of vanishing communities in the American Southwest. - *J. Arid Environ.* 88: 213–221.
- 367 Pellissier, L. et al. 2013. Combining food web and species distribution models for improved com-  
368 munity projections. - *Ecol. Evol.* 3: 4572–4583.
- 369 Poelen, J. H. et al. 2014. Global Biotic Interactions: An open infrastructure to share and analyze  
370 species-interaction datasets. - *Ecological Informatics* 24: 148–159.
- 371 Poisot, T. 2015. Best publishing practices to improve user confidence in scientific software. - *Ideas*  
372 *in Ecology & Evolution* in press.
- 373 Poisot, T. et al. 2015. Beyond species: why ecological interaction networks vary through space and  
374 time. - *Oikos* 124: 243–251.
- 375 Pronk, T. E. et al. 2015. A game theoretic analysis of research data sharing. - *PeerJ* 3: e1242.
- 376 Schmill, M. D. et al. 2014. GLOBE: Analytics for Assessing Global Representativeness. - 2014  
377 Fifth International Conference on Computing for Geospatial Research and Application in press.
- 378 Seeber, F. 2008. Citations in supplementary information are invisible. - *Nature* 451: 887–887.
- 379 Stouffer, D. B. et al. 2012. Evolutionary Conservation of Species' Roles in Food Webs. - *Science*  
380 335: 1489–1492.
- 381 Strong, J. S. and Leroux, S. J. 2014. Impact of Non-Native Terrestrial Mammals on the Structure  
382 of the Terrestrial Mammal Food Web of Newfoundland, Canada. - *PloS One* 9: e106264.
- 383 Thompson, R. M. et al. 2012. Food webs: reconciling the structure and function of biodiversity. -  
384 *Trends Ecol. Evol.*: 1–9.



385 Thuiller, W. et al. 2013. A road map for integrating eco-evolutionary processes into biodiversity  
386 models. - *Ecol. Lett.* 16: 94–105.

387 Whelan, A. M. et al. 2014. Editorial. - *Ecological Applications* 24: 1–2.

388 White, E. P. 2015. Some thoughts on best publishing practices for scientific software. - *Ideas in*  
389 *Ecology & Evolution* in press.

## 390 **List of Figures**

- 391 1 Visual representation of the initial data. On the left, we show the food web (orig-  
392 inal data and interactions from GLOBI), with genera forming modules (clusters of  
393 densely connected nodes) in different colors. On the right, we show the occurrence  
394 data where each dot represents one observation from BISON and GBIF (again color  
395 coded by module). . . . . 19
- 396 2 Maps for the number of genera, number of interactions, and connectance in the as-  
397 sembled networks (on the left) as well as their underlying relationship with latitude  
398 (on the right). The tropics are shaded in light yellow. The average value of each  
399 output has been (i) averaged across latitudes and (ii) z-score transformed; this em-  
400 phasizes variations across the gradient as opposed to absolute values (which is a  
401 more conservative way of looking at the results since the predictions are qualitative). 20

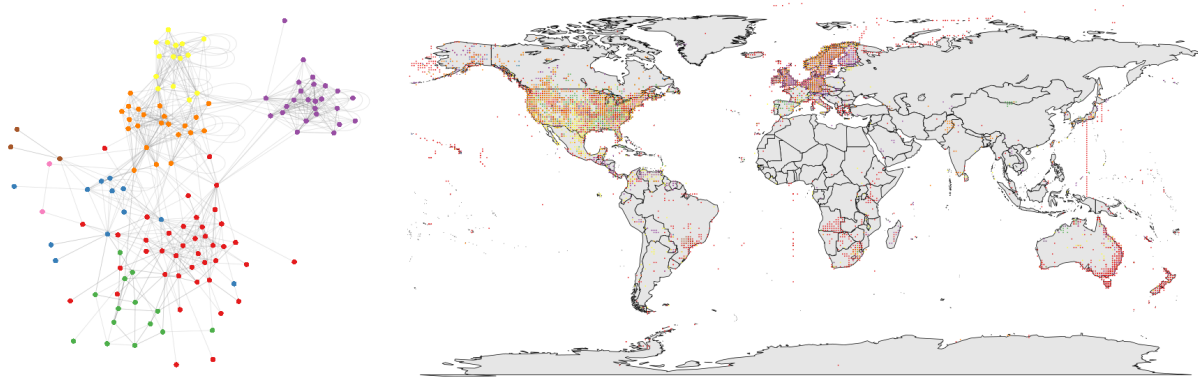

Figure 1: Visual representation of the initial data. On the left, we show the food web (original data and interactions from GLOBI), with genera forming modules (clusters of densely connected nodes) in different colors. On the right, we show the occurrence data where each dot represents one observation from BISON and GBIF (again color coded by module).

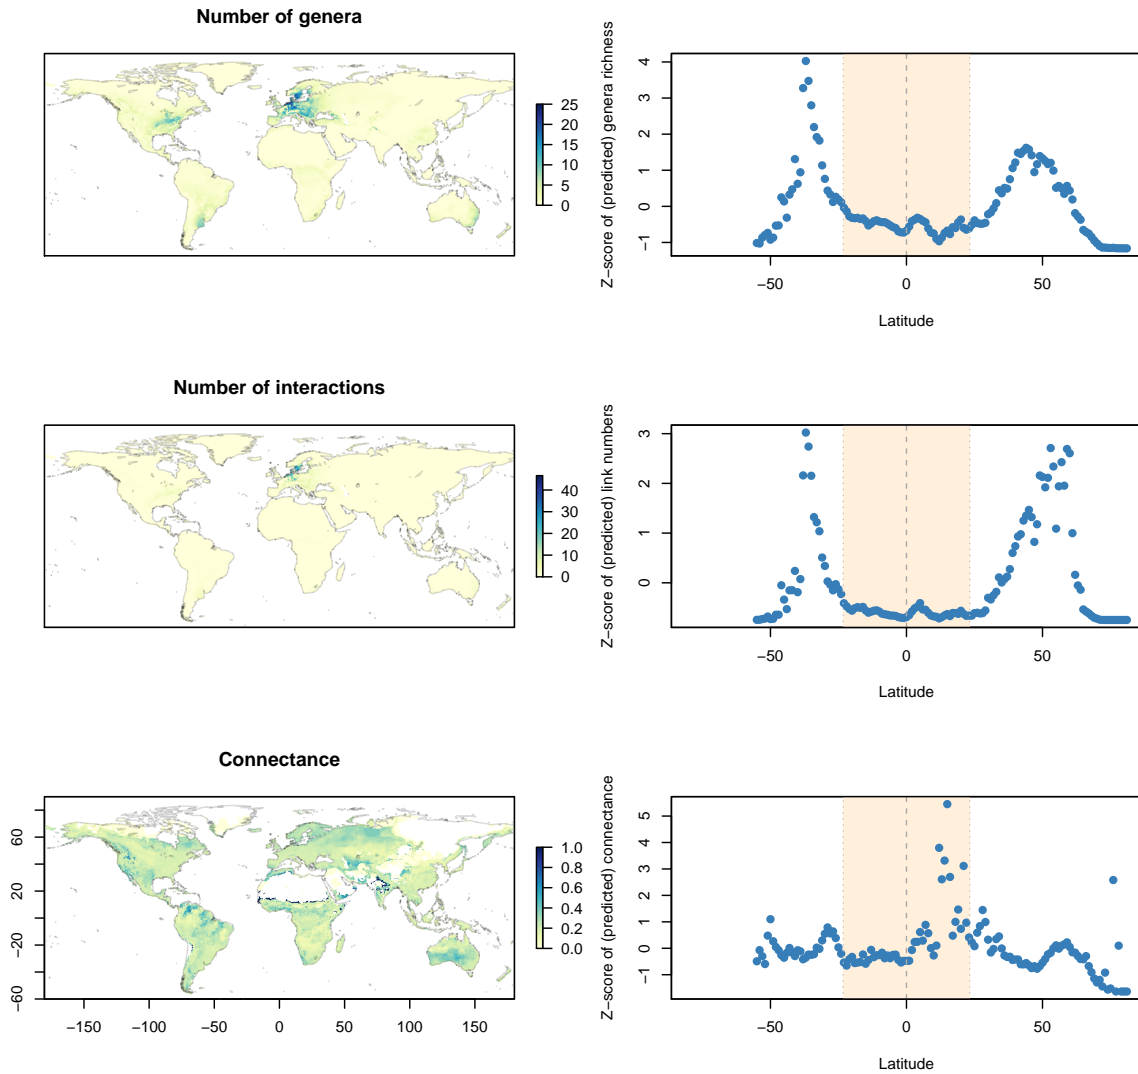

Figure 2: Maps for the number of genera, number of interactions, and connectance in the assembled networks (on the left) as well as their underlying relationship with latitude (on the right). The tropics are shaded in light yellow. The average value of each output has been (i) averaged across latitudes and (ii) z-score transformed; this emphasizes variations across the gradient as opposed to absolute values (which is a more conservative way of looking at the results since the predictions are qualitative).
